# Starting antiretroviral therapy within seven days of a positive HIV test increased the risk of loss to follow up in a primary healthcare clinic: a retrospective cohort study in Masaka, Uganda.

**Authors:** Julius Kiwanuka<sup>1,2\*</sup>, Jacinta Mukulu Waila<sup>2</sup>., Kahungu Methuselah Muhindo<sup>1,2</sup>., Jonathan Kitonsa<sup>2,3</sup>, and Noah Kiwanuka<sup>2</sup>

## Institutions

<sup>1</sup>AIDS Healthcare Foundation, Kampala, Uganda

<sup>2</sup> Department of Epidemiology and Biostatistics, School of Public Health, Makerere University Kampala, Uganda

<sup>3</sup> Medical Research Council / Uganda Virus Research Institute & London School of Hygiene and Tropical Medicine Uganda Research Unit, Entebbe, Uganda

## \*Corresponding author

Julius Kiwanuka, Email: [Jkiwanuka74@gmail.com](mailto:Jkiwanuka74@gmail.com); [Julius.Kiwanuka@aidshealth.org](mailto:Julius.Kiwanuka@aidshealth.org)

## 18 Abstract

19 **Background:** Retention of patients initiated on antiretroviral therapy (ART) and good adherence  
20 remain cornerstones to long-term viral suppression. In this era of test and treat (T&T), ensuring that  
21 patients initiated on ART remain connected to HIV clinics will be key to the achievement of the  
22 UNAIDS 90-90-90 targets. Currently, limited studies have evaluated the effect instant ART initiation  
23 has on loss to follow up in a typical service healthcare setting. We studied the cumulative incidence,  
24 incidence rate of loss to follow up (LTFU), and factors associated with loss to follow up (LTFU) in a  
25 primary healthcare clinic that has practiced test and treat since 2012.

26 **Methods:** We retrospectively drew routine program data of patients initiated on ART from January  
27 2012 to December 2016. We defined LTFU as failure of a patient to return to the HIV clinic for at  
28 least 90 days from the date of their last appointment. We calculated cumulative incidence, incidence  
29 rate and fitted a multivariable Cox proportion hazards regression model to determine factors associated  
30 with LTFU.

31 **Results:** Of the 8,136 patients included in our sample, 3,606 (44.3%) started ART within seven days  
32 of HIV diagnosis. Females were 62.3%, median (interquartile range) age at start of ART was 30 (25,  
33 37) years, 50.1% had access to a mobile phone, 54.0% had a baseline CD4 cell count of <350 cells/ml,  
34 14.8% were in either WHO stage 3 or 4 at baseline and 75.9% had a normal body mass index (BMI).  
35 There were 1,207 cases of LTFU observed over 15953.0 person years at risk. The overall incidence  
36 rate (IR) of LTFU was 7.6 (95% CI=7.2-8.0) per 100 person years of observation (pyo). Cumulative  
37 incidence of LTFU increased with duration of follow up from 8.8% (95% CI=8.2-9.4%) and 12.0%  
38 (95% CI=11.2-12.7%) at 6 and 12 months, to 17.9% (95% CI=16.9-18.9%) and 20.1% (95% CI=18.9-  
39 21.3%) at 36, and 48 months respectively. Predictors of elevated risk of LTFU were; starting ART  
40 within 7 days of a positive diagnosis ((aHR) =1.39, 95% CI, 1.13-1.71), lack of access to a telephone

41 set (aHR=1.60, 95% CI, 1.29-1.99) and baseline WHO clinical stage 3 or 4 (aHR =1.53, 95% CI, 1.11-  
 42 2.11). Factors associated with a reduced risk of LTFU were; baseline age  $\geq 25$  years, and having a BMI  
 43  $\geq 30$  (aHR =0.28, 95% CI, 0.15-0.51).

44 **Conclusion:** Initiation of ART within 7 days of an HIV diagnosis was associated with an elevated risk  
 45 of loss to follow up. Steep ART initiation needs to be backed by enhanced adherence and retention  
 46 counseling to reach the 2020 UNAIDS goals and beyond.

47 **Keywords:** Loss to follow up, Test and Treat, antiretroviral therapy, Retention.

48

## 49 **Background and rationale**

50 By the end of 2017, the World Health Organization (WHO) estimated that globally about 36.9 million  
 51 people were living with HIV (PLHIV) and 1.8 million new infections occurred that year; over two  
 52 thirds of the new infections were in Sub Saharan Africa (SSA) with about 50,000 in Uganda. During  
 53 the same time, about 21.7 million (~59%) of the PLHIV patients had been initiated on antiretroviral  
 54 therapy (ART) [1]. To accelerate epidemic control, the United Nations Joint Program on HIV/AIDS  
 55 (UNAIDS) set ambitious targets (90-90-90 campaign). One of the targets is to achieve 90% viral  
 56 suppression in patients initiated on ART[2]. Whereas factors contributing to patients' viral suppression  
 57 are multi-factorial [3–8], retention of patients initiated on treatment and ensuring good adherence  
 58 remain cornerstones to long term viral suppression and better treatment outcomes. The 2016 WHO  
 59 and Ugandan Ministry of Health guidelines recommended start of ART regardless of CD4 and clinical  
 60 stage of the disease[9,10]. The rationale is to arrest the disease before onset of opportunistic infections  
 61 as well as accelerating achievement of the 2020 UNAIDS targets. Treatment as prevention studies  
 62 demonstrated the effectiveness of ART in prevention of new HIV infections [11–14]. Therefore,  
 63 scaling up ART coverage has public health benefits of reducing new infections through reduced  
 64 community viral loads. Whereas achievement of the second and third UNAIDS targets demands  
 65 timeliness in ART initiation, ensuring continuous engagement of patients with the health care system  
 66 for periodic drug refills and running monitoring tests are critical to the success of this rapid ART scale-  
 67 up. In spite of all this, loss to follow up of patients after ART initiation remains a great challenge.  
 68 Systematic reviews of studies on the rapidly expanding ART programs in SSA illustrated that about  
 69 60-65% of patients were retained in HIV care at 2 to 3 years after starting ART [15,16]. In settings  
 70 where patients start ART instantly after a positive HIV test, there is a possibility of offsetting the  
 71 benefits associated with the immediate initiation when patients do not return to the HIV clinics.

72 Patients need to perceive the clinical benefits of treatment continuation without interruptions.  
 73 Previously, late presentation was common and HIV care and treatment guidelines stipulated that, only  
 74 those presenting with WHO clinical stage III or IV of HIV/AIDS or had their CD4s decline to certain  
 75 levels qualified for ART initiation. However, majority of patients currently diagnosed with HIV  
 76 present in the early stages (WHO stage 1 or 2 or with CD4 cell count >500cell/ml) and initiate ART  
 77 right away or shortly thereafter. Experiences from prevention of mother to child transmission  
 78 (PMTCT) of HIV programs where instant ART initiation has widely been practiced indicate sub-  
 79 optimal levels of ART adherence and retention of mothers in care[17 ,18]. LTFU is associated with  
 80 drug resistance, and comparatively poor long-term treatment outcomes, including mortality [19]. In  
 81 resource constrained SSA countries, enhanced ART initiation will benefit from data characterizing  
 82 retention of patients in typical clinical settings. To date however, a few studies have explored loss to  
 83 follow up and associated factors in a typical HIV clinic practicing test and treat. Most of the data  
 84 currently available are derived from implementation of test-and-treat in research settings. In this study,  
 85 we set out to study the cumulative incidence and incidence rate of loss to follow up, and factors  
 86 associated with loss to follow up in a primary healthcare clinic that has practiced test and treat since  
 87 2012.

## 88 **Methodology**

### 89 **Study design**

90 This was a retrospective cohort study utilizing data collected on patients who were diagnosed with  
 91 HIV and enrolled into HIV care from January 2012 to December 2016 at Masaka regional referral  
 92 hospital, -Uganda Cares' clinic. A patient's ART initiation date defined the beginning of follow up

(time zero) and follow up period was from 01<sup>st</sup> January 2012 to 31<sup>st</sup> December 2016. Patients with documented transfer out status contributed follow up time up to the date of transfer out. Patients' follow up ended if they died, transferred out to another HIV service delivery point, were LTFU or censored at 31<sup>st</sup> December 2016.

## **Study site and settings**

Masaka regional referral hospital (MRRH), -Uganda Cares' clinic serves as the main HIV outpatient department (OPD) clinic for the regional referral hospital. The total catchment population for MRRH currently exceeds 2,000,000 people (according to the Uganda population and housing census-UPHC, 2014), distributed in almost ten districts. The HIV clinic runs five days a week and by the end of 2016, more than 13,000 clients were active in care, with more than **86%** initiated on ART. The clinic serves patients of all characteristics including sex workers from the various hot spots of the Kampala-Masaka-Mbarara high-way and from neighboring fishing communities.

## **HIV testing, linkage to care and initiation of ART in the study setting**

At the beginning of 2012, provider initiated counseling and testing (PITC) was scaled up in MRRH. At the same time, voluntary counseling and testing (VCT) as well as home based HIV Counseling and Testing (HBHCT) outreaches were scaled up in the nearby villages. A serial testing algorithm was used during the study period. For screening; Determine™ HIV-1/2 (Alere Medical Company Limited, Chiba, Japan) and INSTI ® HIV-1/2 antibody test (Biolytical laboratories, Richmond, Canada). For confirmatory; Stat-Pak® Dipstick (Chembio Diagnostic Systems, Medford, NY - USA) and Uni-Gold™ HIV (Trinity Biotech, Bray, Ireland) for tie breaking. Clients diagnosed with HIV within the hospital were enrolled into HIV care and encouraged to start on ART instantly or shortly after. During this period, a stand-alone desk (focal desk at the HIV clinic) was set up to fast track this. Patients

diagnosed with HIV at the outreach sites were referred to this focal desk by trained counselors, to further aid and expedite ART initiation. Although the clinic begun piloting a T&T strategy at the beginning of 2012, it is important to note that this strategy wasn't a true manifestation of T&T as illustrated by the treatment as prevention (TasP) group, but rather a process where the ART initiation process was expedited, with the preparatory counseling phase taking a maximum of one week. Under this T&T strategy, point of care CD4 cell count and TB assessment were done within a week to further determine ART eligibility. However, patients who declined ART instantly or within seven days were initiated on ART at a time of their convenience with a similar array of services as their counterparts who started ART instantly or shortly after. At the time and until June 2013, the ministry of health (MoH) policy to start ART was based on CD4 cell  $\leq 350$  cells/ml or WHO clinical stages 3 or 4 [20]. After this period, the guidelines changed to ART initiation based on CD4 cell count  $\leq 500$  cells/ml, WHO clinical stages 3 or 4 while "test and treat" was applicable to children, adolescents below 15 years and key populations [21].

## Study participants

We included all patients aged  $\geq 18$  years, tested and initiated on ART from 01<sup>st</sup> January 2012 to 31<sup>st</sup> December 2016 regardless of whether or not they tested at Masaka regional referral hospital. We excluded patients who transferred in from other HIV clinics because we were not able to confirm their HIV test and ART initiation dates with certainty, and patients with prior ART history (for example those that had ever used PEP since we could not ascertain the period when they were on medication). In addition, patients  $< 18$  years were excluded because they are children according to the Ugandan policy, but also because they do not decide on health service delivery options on their own but rather through their parents/care givers or guardians.

## 138 **Variables, data sources and measurement**

139 The primary outcome was loss to follow up defined as failure of the client to show up at the Masaka  
 140 clinic for at least 90 days from the date of their last scheduled appointment [37, 39] taking 31<sup>st</sup>  
 141 December 2016 as the reference date. We determined loss to follow up by comparing a patients' most  
 142 recent scheduled return visit date recorded into the electronic database with the reference date (31<sup>st</sup>  
 143 December 2016). The primary exposure (mode of treatment) was whether or not a patient was initiated  
 144 on ART within seven days of HIV diagnosis. We defined test and treat (T&T) as patients who were  
 145 initiated on ART within seven days of the HIV positive test; else, they were deferred. Other extraneous  
 146 variables included; patients' sex, age at ART initiation (determined by subtracting date of birth from  
 147 the date of initiating ART), level of education, marital status, baseline CD4 cell count, baseline WHO  
 148 stage, TB status at enrollment, ownership of a telephone set, and body mass index (BMI) calculated  
 149 using the weight and height according to the formula  $BMI = \text{weight}/\text{height(m)}^2$ . A study data  
 150 extraction checklist with all study variables was piloted before data collection from the electronic  
 151 database. The data were extracted in a Microsoft excel spread sheet, and cleaned. For incomplete and  
 152 missing records, patients' charts (source documents) were used to further clean the data set. A cleaned  
 153 dataset was exported to Stata® version 13 for analysis.

## 154 **Statistical methods**

155 We summarized patients' characteristics by medians (interquartile range) for continuous variables and  
 156 categorical characteristics were summarized by percentage. We limited determination of associations  
 157 to only variables with complete data and only reported missing data at the descriptive stage.  
 158 Comparison of continuous and categorical baseline characteristics was done by using t-tests and chi-  
 159 square or Fisher exact tests. We analysed data at bivariate level to estimate crude estimates or



predictors of associations and multivariable cox regression modelling to estimate adjusted predictors of time to loss to follow up. Multivariable model building involved a stepwise approach. We included variables with a p value of  $<0.2$  at bivariate and dropped each turning out with a  $P>0.05$  at multivariable model building. Insignificant variables at this stage but highlighted in previous literature as significantly associated with LTFU were included in the final model. The proportion hazards (PH) assumption was evaluated for each of the variable included in the final model. Kaplan Meier survival curves were used to determine patients LTFU. In all statistical tests, a 5% level of significance was assumed.

# **Ethical considerations.**

This study was approved by the Makerere University School of Public Health Higher Degrees Research Committee. We also sought approval from the management of the HIV clinic, to allow us access to patients' data. Program data routinely collected and entered into an electronic records management system (OpenMRS) was extracted without patients' direct identifying information.

## 179    **Results**

### 180    **Baseline characteristics.**

181    During the period January 2012 to December 2016, a total of 11,933 patients were extracted and 8,136  
 182    patients met the study inclusion criteria (Figure 1). Overall, there were more females (62.3%) than  
 183    males. The median (IQR) age at start of ART was 30 (25-37), 20% started ART aged  $\geq 40$  years.  
 184    About 86% had attained at least primary level of education. The proportion of those married and  
 185    divorced was 41.0% and 20.9% respectively. A half (50.1%) had access to a telephone set and the  
 186    mean (SD) weight at start of ART was 55 (10.7) Kgs. Overall median (IQR) CD4 cell count was 328  
 187    (180-490) cells/ml, with 301(171-440) cells/ml in the group starting ART  $\leq 7$  days and 352 (190-529)  
 188    cells/ml in those who started after seven days. Our cohort had 14.8% of patients in either WHO clinical  
 189    stage 3 or 4 at baseline, and 6.3% were suspected to have TB according to the initial TB assessment  
 190    forms filled by clinicians. The proportion of patients who were started on a Tenofovir Disoproxil  
 191    Fumarate (TDF) based regimen were 77.4% and just above three quarters (75.9%) had a normal  
 192    baseline Body Mass Index (BMI) of 18.51-29.99.

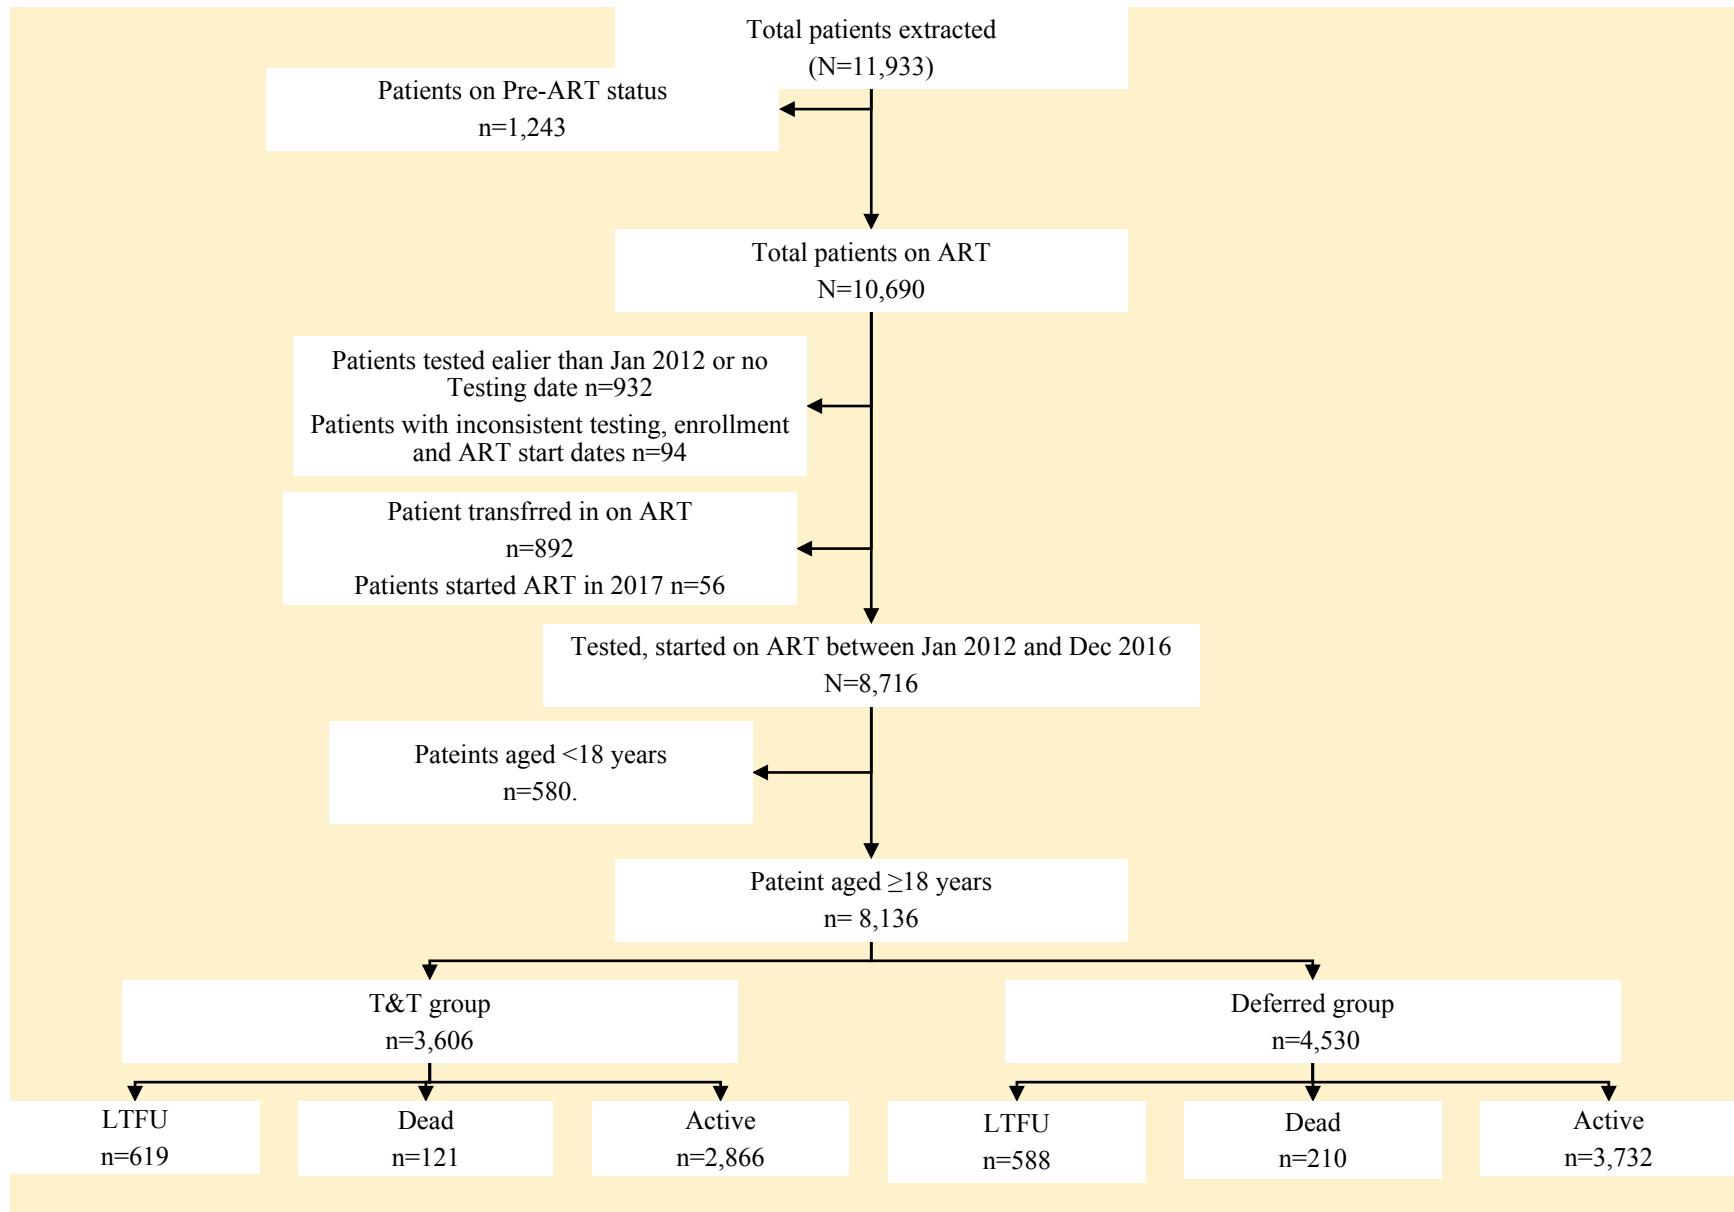

193

194

Figure 1: A flow diagram showing patients abstraction and inclusion into the study and their outcomes

195 Table 1: Patients background characteristics

| Characteristic (s)      | Categories         | Initiated on ART within 7Days |      | Initiated on ART after 7Days |      | All Groups    |      |
|-------------------------|--------------------|-------------------------------|------|------------------------------|------|---------------|------|
|                         |                    | n                             | %    | n                            | %    | n             | %    |
| Sex                     | Male               | 1242                          | 34.4 | 1824                         | 40.3 | 3066          | 37.7 |
|                         | Female             | 2364                          | 65.6 | 2706                         | 59.7 | 5070          | 62.3 |
| Age (years)             | Median (IQR)       | 30 (25-37)                    |      | 30 (25-37)                   |      | 30 (25-37)    |      |
|                         | 18-24              | 853                           | 23.7 | 949                          | 21.0 | 1802          | 22.1 |
|                         | 25-29              | 945                           | 26.2 | 1113                         | 24.6 | 2061          | 25.3 |
|                         | 30-39              | 1111                          | 30.8 | 1576                         | 34.8 | 2688          | 33.0 |
|                         | 40-49              | 474                           | 13.1 | 630                          | 13.9 | 1105          | 13.6 |
|                         | 50+                | 223                           | 6.2  | 262                          | 5.8  | 485           | 6.0  |
|                         |                    |                               |      |                              |      |               |      |
| Marital Status          | Never Married      | 248                           | 6.9  | 351                          | 7.8  | 599           | 7.4  |
|                         | Married            | 1586                          | 44.0 | 1753                         | 38.7 | 3339          | 41.0 |
|                         | Divorced/Separated | 712                           | 19.7 | 990                          | 21.9 | 1702          | 20.9 |
|                         | Widowed            | 52                            | 1.4  | 83                           | 1.8  | 135           | 1.7  |
|                         | Missing            | 1008                          | 28.0 | 1353                         | 29.9 | 2361          | 29.0 |
| Education               | None               | 237                           | 6.6  | 366                          | 8.1  | 603           | 7.4  |
|                         | Primary            | 1827                          | 50.7 | 2540                         | 56.1 | 4367          | 53.7 |
|                         | Secondary          | 1094                          | 30.3 | 1191                         | 26.3 | 2285          | 28.1 |
|                         | Post-secondary     | 172                           | 4.8  | 163                          | 3.6  | 335           | 4.1  |
|                         | Missing            | 276                           | 7.7  | 270                          | 6.0  | 546           | 6.7  |
|                         |                    |                               |      |                              |      |               |      |
| Has Telephone           | No                 | 1473                          | 40.9 | 2588                         | 57.1 | 4061          | 49.9 |
|                         | Yes                | 2133                          | 59.2 | 1942                         | 42.9 | 4075          | 50.1 |
| Baseline Weight (Kgs)   | Mean (SD)          | 56.6 (10.8)                   |      | 55.9 (10.6)                  |      | 55(10.7)      |      |
|                         | <45                | 337                           | 9.5  | 473                          | 10.5 | 810           | 10.0 |
|                         | 45-60              | 2209                          | 62.1 | 2831                         | 62.7 | 5040          | 62.4 |
|                         | 61+                | 1014                          | 28.5 | 1211                         | 26.8 | 2225          | 27.6 |
|                         | Missing            |                               |      |                              |      | 61            | 0.7  |
|                         |                    |                               |      |                              |      |               |      |
| Baseline CD4 cell count | Median (IQR)       | 301 (171-440)                 |      | 352(190-529)                 |      | 328 (180-490) |      |
|                         | <350               | 1949                          | 59.4 | 2201                         | 49.9 | 4150          | 54.0 |
|                         | 350-500            | 793                           | 24.2 | 944                          | 21.4 | 1737          | 22.6 |

|                             |              |      |      |      |      |      |      |
|-----------------------------|--------------|------|------|------|------|------|------|
|                             | >=500        | 538  | 16.4 | 1268 | 28.7 | 1806 | 23.5 |
| Baseline WHO clinical stage | 1&2          | 3150 | 87.7 | 3760 | 83.1 | 6910 | 85.2 |
|                             | 3&4          | 441  | 12.3 | 763  | 16.9 | 1204 | 14.8 |
| TB status                   | No signs     | 3283 | 91.0 | 3914 | 86.4 | 7197 | 88.5 |
|                             | TB Suspect   | 281  | 7.8  | 231  | 5.1  | 512  | 6.3  |
|                             | TB Diagnosed | 5    | 0.1  | 274  | 6.1  | 279  | 3.4  |
|                             | TB treatment | 19   | 0.5  | 100  | 2.2  | 119  | 1.5  |
|                             | Missing      | 18   | 0.5  | 11   | 0.2  | 29   | 0.4  |
| Baseline ART regimen        | ABC based    | 15   | 0.4  | 12   | 0.3  | 27   | 0.3  |
|                             | AZT based    | 480  | 13.3 | 1323 | 29.2 | 1803 | 22.2 |
|                             | TDF based    | 3108 | 86.2 | 3190 | 70.4 | 6298 | 77.4 |
|                             | Other        | 3    | 0.1  | 5    | 0.1  | 8    | 0.1  |
| Year of Starting ART        | 2012         | 292  | 8.1  | 1056 | 23.3 | 1348 | 16.6 |
|                             | 2013         | 538  | 14.9 | 1253 | 27.7 | 1791 | 22.0 |
|                             | 2014         | 940  | 26.1 | 980  | 21.6 | 1920 | 23.6 |
|                             | 2015         | 993  | 27.5 | 782  | 17.3 | 1775 | 21.8 |
|                             | 2016         | 843  | 23.4 | 459  | 10.2 | 1302 | 16.0 |
| Baseline BMI                | <18.50       | 407  | 21.0 | 639  | 21.4 | 1046 | 21.2 |
|                             | 18.51-29.99  | 1480 | 76.3 | 2260 | 75.6 | 3740 | 75.9 |
|                             | >=30         | 53   | 2.7  | 92   | 3.1  | 145  | 2.9  |

## Study outcomes.

### a) Overall loss to follow up

There were 1,207 cases of LTFU observed over 15,953.0 person years at risk. The overall incidence rate (IR) of LTFU was 7.6 (95% CI=7.2-8.0) per 100 person years of observation (pyo). Cumulative incidence of LTFU at 6 months was 8.8% (95% CI=8.2-9.4%), 12 months 12.0% (95% CI=11.2-12.7%), 24 months 15.7% (95% CI=14.9%-16.6%), 36 months 17.9% (95% CI=16.9-18.9%) and

204 20.1% (95% CI=18.9-21.3%) at 48 months. Figures 2 and 3 illustrate the overall proportion of  
 205 patients LTFU and cumulative incidence of LTFU by study group respectively. It can be observed  
 206 that at all time points, the cumulative incidence of loss to follow up was significantly higher in the  
 207 group that started ART within seven days of an HIV test compared to those who delayed.

208 Figure 2: Overall Proportion of patients lost to follow up in the study period.

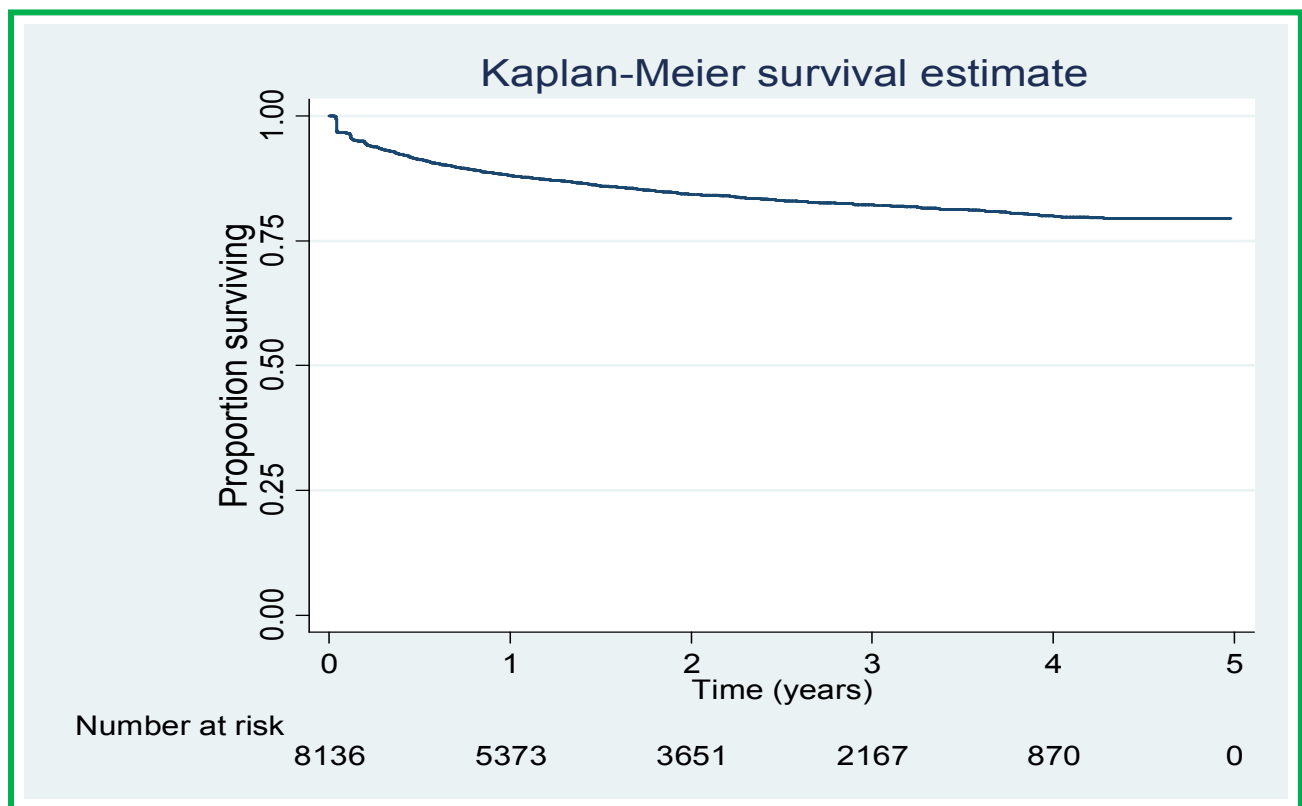

210 Figure 3: Cumulative Incidence of Loss to follow up by study group at different time points

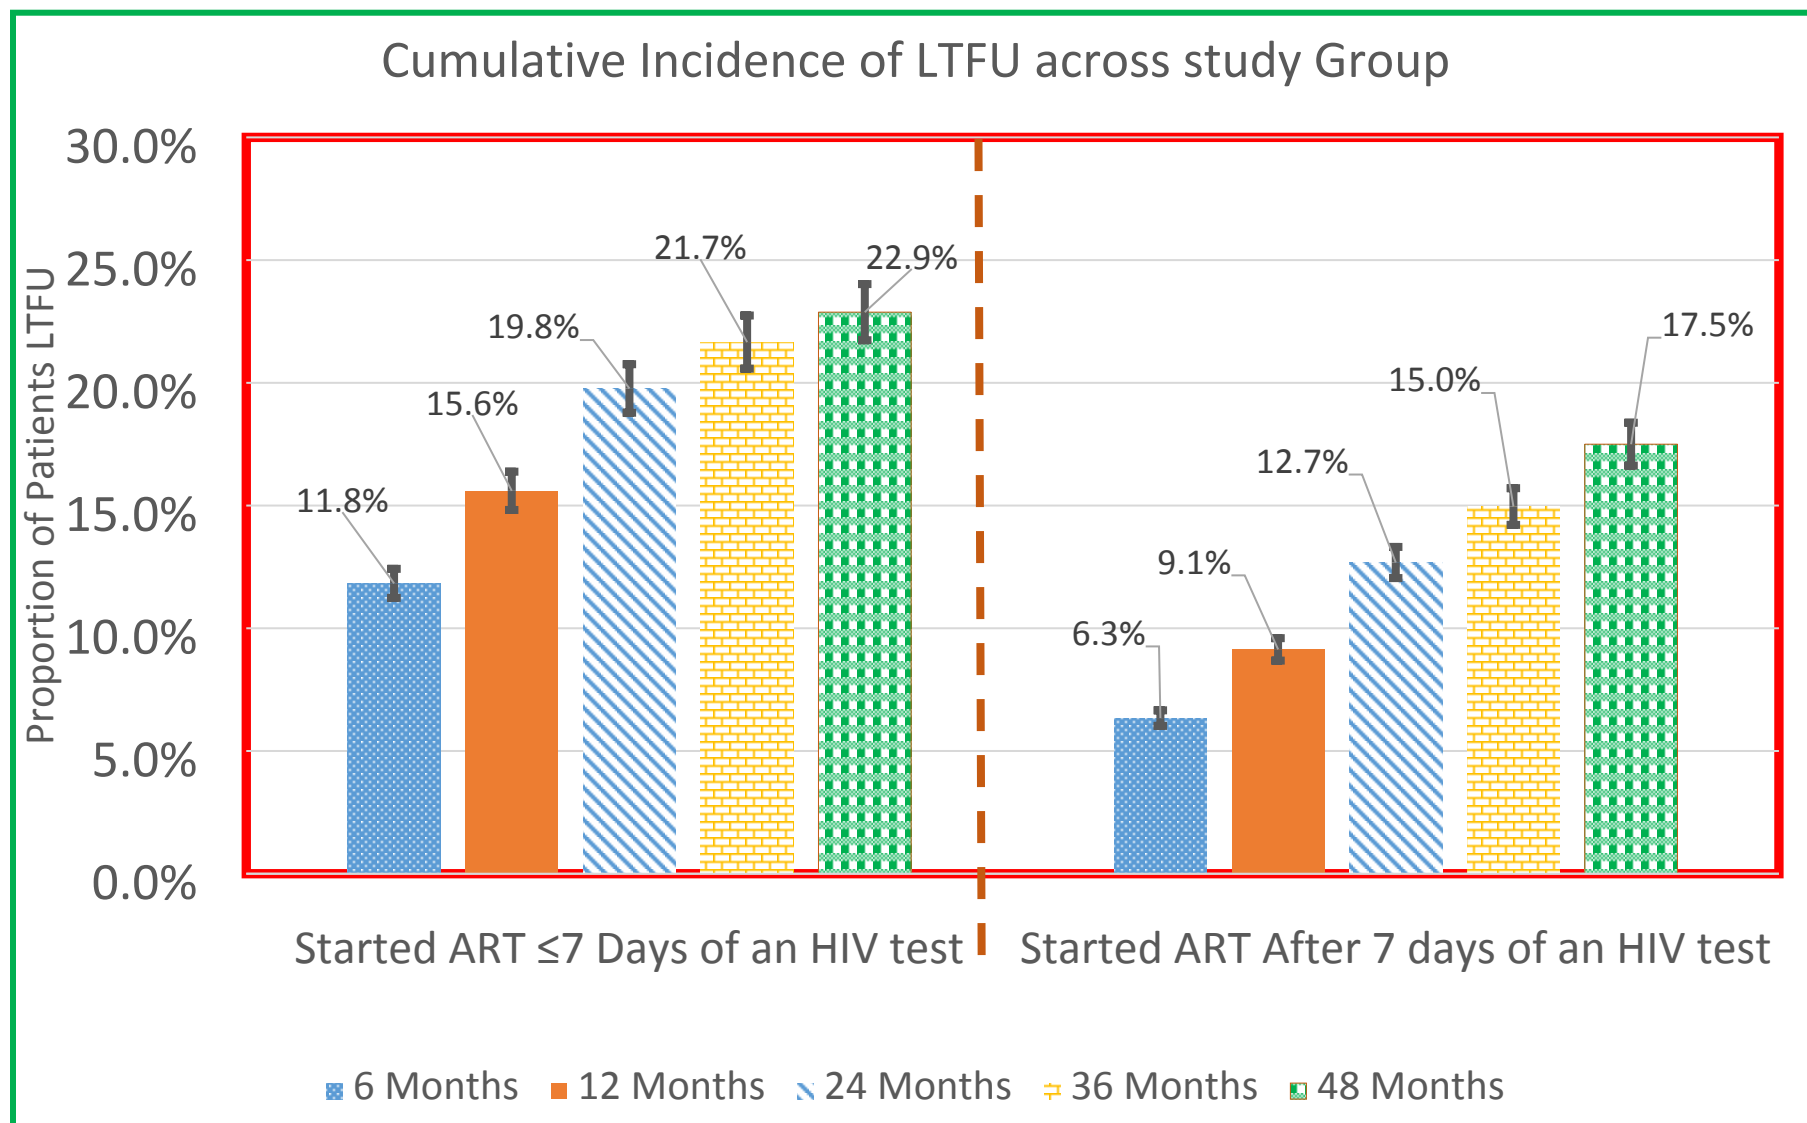

**b) Incidence rate of loss to follow up by patients characteristics.**

Table 2 indicates the IR of loss to follow up by patients' characteristics. The incidence rate of LTFU was 10.9/100 pyo in the T&T group compared to 5.7/100 pyo in the delayed ART group. There was no difference in incidence rate of LTFU among males 7.4/100 pyo (95% CI, 6.7-8.1/100pyo) and females -7.7/100 pyo (95% CI, 7.2-8.3/100pyo).

The IR was highest at 14.6/100 pyo (95% CI, 13.3-16.1/100pyo) in patients that initiated ART in the age group 18-24 years and was lowest at 4.2/100 pyo (95% CI, 3.2-5.7/100pyo) among those aged  $\geq 50$  years. In patients with access to a telephone set, the IR was 6.6/100 pyo (95% CI, 6.1-7.2/100pyo) compared to 8.4/100 pyo (95% CI, 7.8-9.0/100pyo) in patients without access to a phone. Incidence rate of LTFU was 6.3/100 pyo (95% CI, 5.8-6.8/100pyo), 6.5/100pyo (95% CI, 5.7-7.3/100pyo) and 6.4/100 pyo (95% CI 5.6-7.3/100pyo) in patients with a baseline CD4 cell count of  $<350$ , 350-500 and  $\geq 501$  respectively. The incidence rate of LTFU was 7.3/100 pyo (95% CI, 6.8-7.7/100pyo) in patients who started ART with clinical disease classified as WHO stage 1 or 2 and this was statistically different from that of patients whose HIV disease was classified as either WHO stage 3 or 4 (IR=9.2/100pyo, 95% CI, 8.0-10.7/100pyo). Furthermore, IR was 7.6/100 pyo (95% CI, 6.5-8.9/100pyo), 6.2/100 pyo (95% CI, 5.7-6.8/100pyo) and 1.3/100 pyo (95% CI, 0.6-3.2/100pyo) in patients with a baseline body mass index of  $\leq 18.50$ , 18.51-29.99 and  $\geq 30$  respectively.

Table 2: Incidence rate of Loss to follow up by Patients characteristics

| Characteristic(s)   | Categories                               | Person          |         |             |        |      |
|---------------------|------------------------------------------|-----------------|---------|-------------|--------|------|
|                     |                                          | Number of Cases | time    | Rate/100PYO | 95% CI |      |
| Overall study group |                                          | 1207            | 15953.0 | 7.6         | 7.2    | 8.0  |
| Study Group         | Started ART $\leq 7$ Days of an HIV test | 619             | 5694.4  | 10.9        | 10.0   | 11.8 |



|                                        |                                            |      |         |      |      |      |
|----------------------------------------|--------------------------------------------|------|---------|------|------|------|
|                                        | Started ART After 7<br>days of an HIV test | 588  | 10258.6 | 5.7  | 5.3  | 6.2  |
|                                        |                                            |      |         |      |      |      |
| Patient's Sex                          | Male                                       | 441  | 5998.7  | 7.4  | 6.7  | 8.1  |
|                                        | Female                                     | 766  | 9954.2  | 7.7  | 7.2  | 8.3  |
|                                        |                                            |      |         |      |      |      |
| Age group (years)                      | 18-24                                      | 431  | 2946.7  | 14.6 | 13.3 | 16.1 |
|                                        | 25-29                                      | 312  | 3976.4  | 7.8  | 7.0  | 8.8  |
|                                        | 30-39                                      | 318  | 5589.5  | 5.7  | 5.1  | 6.4  |
|                                        | 40-49                                      | 102  | 2404.1  | 4.2  | 3.5  | 5.2  |
|                                        | 50+                                        | 44   | 1036.3  | 4.2  | 3.2  | 5.7  |
|                                        |                                            |      |         |      |      |      |
| Patient's Marital<br>Status            | Never Married                              | 109  | 1000.1  | 10.9 | 9.0  | 13.2 |
|                                        | Married                                    | 487  | 6604.8  | 7.4  | 6.7  | 8.1  |
|                                        | Divorced/Separated                         | 265  | 3081.0  | 8.6  | 7.6  | 9.7  |
|                                        | Widowed                                    | 14   | 309.5   | 4.5  | 2.7  | 7.6  |
|                                        | Missing                                    | 332  | 4957.6  | 6.7  | 6.0  | 7.5  |
|                                        |                                            |      |         |      |      |      |
| Highest<br>Education level<br>attained | None                                       | 112  | 1166.7  | 9.6  | 8.0  | 11.6 |
|                                        | Primary                                    | 653  | 8683.7  | 7.5  | 7.0  | 8.1  |
|                                        | Secondary                                  | 321  | 4400.8  | 7.3  | 6.5  | 8.1  |
|                                        | Post-secondary                             | 32   | 683.8   | 4.7  | 3.3  | 6.6  |
|                                        | Missing                                    | 89   | 1018.0  | 8.7  | 7.1  | 10.8 |
|                                        |                                            |      |         |      |      |      |
| Whether Patient<br>has Telephone       | No                                         | 711  | 8479.9  | 8.4  | 7.8  | 9.0  |
|                                        | Yes                                        | 496  | 7473.1  | 6.6  | 6.1  | 7.2  |
|                                        |                                            |      |         |      |      |      |
| Baseline Weight<br>(Kgs)               | <45                                        | 132  | 1463.9  | 9.0  | 7.6  | 10.7 |
|                                        | 45-60                                      | 786  | 9834.0  | 8.0  | 7.5  | 8.6  |
|                                        | 61+                                        | 257  | 4625.3  | 5.6  | 4.9  | 6.3  |
|                                        |                                            |      |         |      |      |      |
| Baseline CD4<br>cell count             | <350                                       | 538  | 8570.1  | 6.3  | 5.8  | 6.8  |
|                                        | 350-500                                    | 243  | 3758.4  | 6.5  | 5.7  | 7.3  |
|                                        | >=500                                      | 225  | 3496.6  | 6.4  | 5.6  | 7.3  |
|                                        |                                            |      |         |      |      |      |
| Baseline WHO<br>clinical stage         | 1&2                                        | 1020 | 14028.2 | 7.3  | 6.8  | 7.7  |
|                                        | 3&4                                        | 177  | 1920.8  | 9.2  | 8.0  | 10.7 |
|                                        |                                            |      |         |      |      |      |
| Patient's baseline<br>TB status        | No signs                                   | 1059 | 14556.8 | 7.3  | 6.8  | 7.7  |
|                                        | TB Suspect                                 | 78   | 777.3   | 10.0 | 8.0  | 12.5 |

|                      |              |     |         |      |     |      |
|----------------------|--------------|-----|---------|------|-----|------|
|                      | TB Diagnosed | 36  | 416.7   | 8.6  | 6.2 | 12.0 |
|                      | TB Treatment | 12  | 200.2   | 6.0  | 3.4 | 10.6 |
| Baseline ART regimen | ABC based    | 4   | 33.8    | 11.8 | 4.4 | 31.5 |
|                      | AZT based    | 239 | 5383.1  | 4.4  | 3.9 | 5.0  |
|                      | TDF based    | 962 | 10521.6 | 9.1  | 8.6 | 9.7  |
|                      | Other        | 2   | 14.5    | 13.8 | 3.5 | 55.3 |
| Baseline BMI         | <18.50       | 147 | 1934.6  | 7.6  | 6.5 | 8.9  |
|                      | 18.51-29.99  | 479 | 7745.1  | 6.2  | 5.7 | 6.8  |
|                      | ≥30          | 5   | 372.0   | 1.3  | 0.6 | 3.2  |

### c) Factors associated with loss to follow up.

Table 3 depicts the unadjusted and adjusted hazard rates of factors associated with time to loss to follow up. None of the variables included in the final model violated the PH assumption. At bivariate, patients starting ART within seven days were 58% more likely to be lost to follow up (crude hazard rate (cHR)=1.58, 95% CI, 1.41-1.78).

In the multivariable analysis, the risk of getting lost to follow up was 39% higher in patients that began treatment ≤7 days compared to those who began after seven days (adjusted Hazard ratios (aHR) =1.39, 95% CI, 1.13-1.71). Patients who started ART aged 18-24 years were more likely to get lost to follow up compared to all other age groups. In Comparison to patients aged 18-24 years at start of ART, those aged 25-29 years were 0.60 times (95% CI, 0.46-0.78) likely and patients aged ≥50 years were 0.23 times (95% CI, 0.12-0.42) likely. Compared to patients with no education, the risk of getting lost to follow was 0.97 times (95% CI, 0.68-1.36) in patients with primary level and 0.47 times (95% CI, 0.22-1.02) in patients whose baseline level of education was post-secondary, although statistical significance was borderline. Patients without access to a telephone set were 60% more likely to get lost compared to those with access to telephone (aHR

=1.60, 95% CI, 1.29-1.99). Patients who started ART with HIV disease classified as WHO stage 3 or 4 were 53% more likely to get LTFU compared to those in WHO stage 1 or 2 (aHR =1.53, 95% CI, 1.11-2.11). Compared to patients with a baseline body mass index of <18.50, patients who were overweight at start of ART were 75% less likely to get LTFU (aHR =0.25, 95% CI, 0.08-0.79). There was no association between CD4 cell count at baseline, baseline TB assessment status and the risk of getting LTFU.

Table 3: Factors associated with time to Loss to follow up.

| Characteristic (s)                  | Categories                                    | crude<br>Hazard<br>Ratios | 95% CI    | P<br>value | Adjusted<br>Hazard<br>Ratios | 95% CI    | P value |
|-------------------------------------|-----------------------------------------------|---------------------------|-----------|------------|------------------------------|-----------|---------|
| Study Group                         | Started ART After<br>7 days of an HIV<br>test | 1.00                      |           |            | 1.00                         |           |         |
|                                     | Started ART ≤7<br>Days of an HIV<br>test      | 1.58                      | 1.41-1.78 | <0.001     | 1.39                         | 1.13-1.71 | 0.002   |
| Patient's Sex                       | Male                                          | 1.00                      |           |            |                              |           |         |
|                                     | Female                                        | 1.05                      | 0.94-1.18 | 0.390      |                              |           |         |
| Age group (years)                   | 18-24                                         | 1.00                      |           |            | 1.00                         |           |         |
|                                     | 25-29                                         | 0.57                      | 0.50-0.66 | <0.001     | 0.60                         | 0.46-0.78 | <0.001  |
|                                     | 30-39                                         | 0.43                      | 0.37-0.50 | <0.001     | 0.46                         | 0.35-0.60 | <0.001  |
|                                     | 40-49                                         | 0.33                      | 0.26-0.41 | <0.001     | 0.34                         | 0.23-0.50 | <0.001  |
|                                     | 50+                                           | 0.32                      | 0.24-0.44 | <0.001     | 0.23                         | 0.12-0.42 | <0.001  |
| Patient's Marital<br>Status         | Never Married                                 | 1.00                      |           |            | 1.00                         |           |         |
|                                     | Married                                       | 0.74                      | 0.60-0.91 | 0.004      | 0.78                         | 0.56-1.09 | 0.144   |
|                                     | Divorced/Separated                            | 0.83                      | 0.66-1.03 | 0.092      | 1.03                         | 0.73-1.44 | 0.879   |
|                                     | Widowed                                       | 0.50                      | 0.28-0.86 | 0.013      | 1.01                         | 0.42-2.44 | 0.980   |
| Highest Education<br>level attained | None                                          | 1.00                      |           |            | 1.00                         |           |         |
|                                     | Primary                                       | 0.79                      | 0.65-0.97 | 0.022      | 0.97                         | 0.68-1.36 | 0.843   |
|                                     | Secondary                                     | 0.76                      | 0.61-0.94 | 0.010      | 0.72                         | 0.49-1.05 | 0.085   |
|                                     | Post-Secondary                                | 0.49                      | 0.33-0.73 | <0.001     | 0.47                         | 0.22-1.02 | 0.056   |

|                               |              |      |           |        |      |           |        |
|-------------------------------|--------------|------|-----------|--------|------|-----------|--------|
| Whether Patient has Telephone | Yes          | 1.00 |           |        | 1.00 |           |        |
|                               | No           | 1.39 | 1.24-1.56 | <0.001 | 1.60 | 1.29-1.99 | <0.001 |
| Baseline CD4 cell count       | <350         | 1.00 |           |        | 1.00 |           |        |
|                               | 350-500      | 1.03 | 0.88-1.20 | 0.710  | 1.06 | 0.83-1.36 | 0.619  |
|                               | >=500        | 0.96 | 0.82-1.12 | 0.618  | 1.02 | 0.78-1.33 | 0.883  |
| Baseline WHO clinical stage   | 1&2          | 1.00 |           |        | 1.00 |           |        |
|                               | 3&4          | 1.15 | 1.00-1.35 | 0.093  | 1.53 | 1.11-2.11 | 0.010  |
| Patient's baseline TB status  | No signs     | 1.00 |           |        | 1.00 |           |        |
|                               | TB Suspect   | 1.21 | 0.96-1.52 | 0.103  | 1.12 | 0.77-1.64 | 0.551  |
|                               | TB Diagnosed | 1.01 | 0.72-1.41 | 0.950  | 0.83 | 0.46-1.49 | 0.536  |
|                               | TB Treatment | 0.76 | 0.43-1.35 | 0.351  | 0.37 | 0.12-1.21 | 0.101  |
| Baseline BMI                  | <18.50       | 1.00 |           |        | 1.00 |           |        |
|                               | 18.51-29.99  | 0.85 | 0.71-1.03 | 0.092  | 0.88 | 0.69-1.13 | 0.323  |
|                               | >=30         | 0.20 | 0.08-0.49 | <0.001 | 0.25 | 0.08-0.79 | 0.018  |

255

256

## 257 Discussion

258 In this retrospective observation study of a primary healthcare clinic practicing test and treat, we  
259 observed a high cumulative incidence of loss to follow up. Four years after starting ART, one in every  
260 five patients that had started ART was lost to follow up. The proportion of LTFU was higher in  
261 patients that started ART within seven days of an HIV positive diagnosis than those who delayed  
262 ART. It is possible that patients had not yet received enough counselling and consequently not yet  
263 appreciated the benefit of starting ART when they were not yet “feeling sick”. Previously, patients  
264 were taken through a minimum of three counselling sessions, were required to bring a treatment  
265 supporter, and had to demonstrate understanding of long term treatment by answering questions after  
266 counselling [22]. We therefore speculate that probable lack of the perceived benefit to start ART on  
267 the same day of a positive diagnosis, coupled with inadequacies in the preparatory counseling could

268 have led to the higher incidence of LTFU in the T&T group. In this cohort for example, of the 3606  
 269 patients that started ART within seven days, 52.1% initiated ART the same day of a positive HIV  
 270 test. Addressing structural bottle necks including counseling after a positive HIV test and before ART  
 271 initiation were identified as strategies for improving ART adherence and retention [23]. Inadequacies  
 272 in pre-ART initiation counseling might compromise the patient's perceived benefit for initiating ART  
 273 instantly; similarly, during such a short while, key patients' concerns that might affect long-term  
 274 retention have not been exhaustively addressed.

275 The absolute differences in the proportions of patients LTFU in the subsequent time points and  
 276 between treatment groups increased and peaked at 24 months. During 2012 and before, ART was not  
 277 commonly provided in health centers at level III (Health Centers at level three). In the Ugandan  
 278 setting, these provide outpatient services, maternity, general ward and laboratory. However, at the  
 279 beginning of 2013 and going forward, most health centers at level III were ART accredited. This is  
 280 suggestive that a large number of patients formerly at Masaka might have opted to receive ART  
 281 services at these centers without formally seeking transfers/referrals. Self-transfers across ART  
 282 programs have been illustrated to conceal the actual proportion of patients categorized as LTFU in a  
 283 study in another similar setting[24]. In a similar realm, Masaka clinic serves as the main HIV OPD  
 284 clinic for the regional referral hospital. We therefore speculate a possibility that patients diagnosed  
 285 on wards and started ART instantly or within 7 days opted to receiving ART at health facilities nearest  
 286 to their usual dwellings once they got better. Furthermore, these patients could have died after starting  
 287 ART but were never reported given the passive nature of surveillance in our setting. Same day HIV  
 288 diagnosis and ART initiation has widely been practiced under PMTCT (specifically under the Option  
 289 B+). It has however been noted that retention in such settings has remained sub optimal. Moreover,  
 290 initiation of ART on the same day of testing positive was independently associated with an elevated  
 291 risk of loss to follow up in the initial months of starting ART [25–28]. A higher proportion of patients  
 292 retained has been reported in a study in rural Uganda [29] and an almost comparable proportion in

293 another study in Malawi [30] both at one year. Differences in proportions reported in these studies to  
 294 ours could result out of methodological variations in determining loss to follow up as well as  
 295 differences in the array of service delivery across the study populations. For example, Brown et al  
 296 [30] evaluated retention in a streamlined care and universal test and treat model, a model designed to  
 297 reduce patient barriers to care, unlike the typical and clinical setting in our study, while Jain et al [29]  
 298 reported retention in asymptomatic patients with CD4 cell count restricted to  $\geq 350$  cells/ml..

299 Similar to another study in the same setting [31], retention rates in all other age groups were better  
 300 compared to adolescence or being a young adult (18-24 years). Retention in adolescents and young  
 301 adults should be an important subject given the rising rates of infection in this particular sub  
 302 population [32] and high rates of viral un-suppression [33]. If not at school, adolescents and young  
 303 adults are usually at conflict with work schedules and most times fail to make routine monthly  
 304 schedules, a requirement in most ART clinics. Similarly, clumping ART services of adults together  
 305 with those of adolescents and young adults might blur individualized adolescent and young adults'  
 306 needs. We anticipate that adolescents and young adults' groups might benefit from differentiated care  
 307 models that address individualized patients' needs.

308 We observed that clients initiated on ART with WHO clinical stage categorized as either 3 or 4 were  
 309 more likely to get LTFU compared to those staged 1 or 2. In asymptomatic patients initiated on ART  
 310 in South Africa, the proportion of LTFU was low. Additionally, a reduced risk of death and improved  
 311 retention rates were observed in a study assessing effectiveness of a streamlined model of care  
 312 [29,30]. Patients categorized as being in stage 3 or 4 manifest with a higher likelihood of getting  
 313 opportunistic infections, and so, will be bed ridden most of the time. This might make their continued  
 314 engagement with the HIV clinic hard. Such patients are further at an increased risk of death especially  
 315 in the first 6 months of ART due to severe immune reconstitution inflammatory syndrome and

316 Cryptococcal meningitis [34,35]. It is therefore possible that they could have died shortly after  
317 starting ART and were never reported to the ART clinic.

318 We observed that patients with access to a telephone (mostly mobile) were less likely to get lost to  
319 follow up. In our setting, patients are sent short reminder text messages (SMS) before the clinic day  
320 and those who miss a clinic day are immediately called for a re-appointment. This cannot happen if  
321 one has no phone and so may lead to loss to follow up. Mobile phone technologies (mHealth),  
322 specifically SMS reminders have improved patient outcomes in other health service delivery settings  
323 [36–38] but were comparable to the standard of care for HIV retention in other settings [21,30] . It is  
324 however important to note that the level of interaction between provider and patient, and subset of  
325 activities under mHealth greatly determine the effectiveness of particular interventions. Therefore,  
326 interactive SMS reminders alone might not improve patient outcomes when compared to a combined  
327 strategy of SMS reminders, home visits and direct phone calls to patients.

328 .

329 We did not find a statistically significant relationship between CD4 cell count and LTFU. This finding  
330 was also observed by Jain et al [26] but contrasts results of studies in other similar settings [40–42].  
331 One possibility for the contrast could be differences in the determination of LTFU as well as the  
332 differing CD4 cell count thresholds used across the studies. A patient was classified LTFU if they  
333 had spent at least 180 days without picking their ART from the HIV clinic after a scheduled visit  
334 [41]. Berheto et al and Honge et al classified patients as LTFU if they failed to pick their ART after  
335 90 days from the last scheduled date [40,42], a similar definition to that used in our study. In the  
336 papers written by Berheto et al and Honge et al, an elevated risk of LTFU was noticeable in patients  
337 that had a baseline CD4 cell count of <200 cells/ml [37,39] while a similar risk was observed in  
338 patients with a CD4 cell count of >200 cells/ml by Mberi et al [41]. In comparison to our cohort, we  
339 categorized CD4 cell count as <350 cells/ml, 350-500 cells/ml and >500 cells/ml. Nevertheless,

340 changes in WHO and in-country treatment guidelines over the course of study period might have  
341 resulted into almost similar immunological patients starting ART in the T&T and deferred groups.

342

## 343 **Limitations**

344 Our study had limitations that should be taken into account while interpreting these findings. First,  
345 we utilized already collected data used for routine patient management. Such data presents with lots  
346 of gaps and sometimes may not present the rigor to warrant scientific research. Whereas this particular  
347 clinic is not a research site, it is part of the east African International epidemiology database to  
348 evaluate AIDS (IeDEA) consortium. As such, there are inherent data validation rules within the  
349 database and daily data cleaning to guarantee a certain degree of data correction and collation.  
350 Secondly, as it is in most HIV programs, there is a passive nature of surveillance and follow up of  
351 patients. There is therefore a possibility of having determined and regarded patients as lost to follow  
352 up in Masaka when they are actually in HIV care and receiving treatment somewhere else. This  
353 therefore, might have resulted into over estimation of the cumulative and incidence rates of lost to  
354 follow up in our study. There is however a dedicated team at the facility that does contact tracing/case  
355 navigation for clients who miss clinic appointments, and we think this might minimize on this  
356 misclassification. Lastly, the nature of data collected was limited. Some of the many health system  
357 (human resource, waiting time, distance) and socio-economic factors (type of work, socio contacts,  
358 HIV disclosure) known to affect loss to follow up were not studied. The effect of such under the  
359 current study settings remained unknown. We anticipate that, examining the effect of these under a  
360 test and treat setting could better inform ART programing and policies towards boosting retention.

361

## 362 **Conclusions**



Our study shows that initiation of ART within 7 days of a positive HIV test is associated with an elevated risk of loss to follow up in the long run. Steep ART initiation needs to be backed by enhanced intensive adherence and retention counseling for improved long term patient outcomes by 2020 and beyond. Our findings further categorize the risk of getting lost to follow up in patients sub groups. This is beneficial to HIV service providers to recognize patients that require enhanced support in this era of test and treat.

## Acknowledgements

We extend our sincere gratitude to Mathew Ssemakadde (Data manager at Masaka Uganda Cares clinic) for his tireless efforts getting us the data from OpenMRS. We are indebted to Dr Cecilia Nattembo, for her insightful reviews and corrections. We also wish to thank the management of Masaka Uganda cares clinic for allowing us use their routine program data without hesitation. We are especially grateful to all the patients from whom big volumes of data are collected routinely.

## Authors' contributions:

**Conceived and designed the experiments:** Julius Kiwanuka, Noah Kiwanuka. **Performed the experiments:** Julius Kiwanuka, Noah Kiwanuka, Jacinta Mukulu Waila, and Jonathan Kitonsa. **Analysed the data:** Julius Kiwanuka. **Wrote and approved the manuscript:** Julius Kiwanuka, Jonathan Kitonsa, Jacinta Mukulu Waila, Methuselah Kahungu Muhindo, and Noah Kiwanuka.

380

381

## References

- 383 1. World Health Organisation. 2017 WHO Data and Statistics. HIVAIDS Data Stat. 2018 [visited on  
384 21 Feb 2019].
- 385 2. Joint United Nations Programme on HIV/AIDS (UNAIDS). 90-90-90: An ambitious treatment  
386 target to help end the AIDS epidemic. UNAIDS; 2014 Oct. [visited on 21 Feb 2019]
- 387 3. Jobanputra K, Parker LA, Azih C, Okello V, Maphalala G, Kershberger B, et al. Factors Associated  
388 with Virological Failure and Suppression after Enhanced Adherence Counselling, in Children,  
389 Adolescents and Adults on Antiretroviral Therapy for HIV in Swaziland. PLOS ONE  
390 2015;10:e0116144.
- 391 4. Rangarajan S, Donn JC, Giang LT, Bui DD, Hung Nguyen H, Tou PB, et al. Factors associated  
392 with HIV viral load suppression on antiretroviral therapy in Vietnam. J Virus Erad. 2016;2:94–101.
- 393 5. Bulage L, Ssewanyana I, Nankabirwa V, Nsubuga F, Kihembo C, Pande G, et al. Factors  
394 Associated with Virological Non-suppression among HIV-Positive Patients on Antiretroviral  
395 Therapy in Uganda, August 2014–July 2015. BMC Infect Dis. 2017;17:326.
- 396 6. Jiamsakul A, Kariminia A, Althoff KN, Cesar C, Cortes CP, Davies M-A, et al. HIV Viral Load  
397 Suppression in Adults and Children Receiving Antiretroviral Therapy-Results From the IeDEA  
398 Collaboration. J Acquir Immune Defic Syndr 1999 . 2017;76:319–29.
- 399 7. Chhim K, Mburu G, Tuot S, Sopha R, Khol V, Chhoun P, et al. Factors associated with viral non-  
400 suppression among adolescents living with HIV in Cambodia: a cross-sectional study. AIDS Res  
401 Ther . 2018;15:20.
- 402 8. Nasuuna E, Kigozi J, Babirye L, Muganzi A, Sewankambo NK, Nakanjako D. Low HIV viral  
403 suppression rates following the intensive adherence counseling (IAC) program for children and

404 adolescents with viral failure in public health facilities in Uganda. BMC Public Health .  
405 2018;18:1048–1048.

406 9. WHO. Consolidated guidelines on the use of antiretroviral drugs for treating and preventing HIV  
407 infection Recommendations for a public health approach - Second edition . Second Edition. WHO;  
408 [cited 2019 Feb 21].

409 10. MoH, Uganda. CONSOLIDATED GUIDELINES FOR PREVENTION AND TREATMENT OF  
410 HIV IN UGANDA [Internet]. Kampala: MoH; 2016 [cited 2019 Feb 21].

411 11. Cohen MS, Chen YQ, McCauley M, Gamble T, Hosseinipour MC, Kumarasamy N, et al.  
412 Prevention of HIV-1 infection with early antiretroviral therapy. N Engl J Med . 2011;365:493–505.

413 12. Cohen MS, McCauley M, Gamble TR. HIV treatment as prevention and HPTN 052. Curr Opin  
414 HIV AIDS. 2012;7:99–105.

415 13. Grinsztejn B, Hosseinipour MC, Ribaudo HJ, Swindells S, Eron J, Chen YQ, et al. Effects of  
416 early versus delayed initiation of antiretroviral treatment on clinical outcomes of HIV-1 infection:  
417 results from the phase 3 HPTN 052 randomised controlled trial. Lancet Infect Dis . 2014;14:281–90.

418 14. Ping L-H, Jabara CB, Rodrigo AG, Hudelson SE, Piwowar-Manning E, Wang L, et al. HIV-1  
419 transmission during early antiretroviral therapy: evaluation of two HIV-1 transmission events in the  
420 HPTN 052 prevention study. PloS One . 2013;8:e71557–e71557.

421 15. Rosen S, Fox MP, Gill CJ. Patient Retention in Antiretroviral Therapy Programs in Sub-Saharan  
422 Africa: A Systematic Review. PLOS Med . 2007;4:e298.

- 423 16. Fox MP, Rosen S. Retention of Adult Patients on Antiretroviral Therapy in Low- and Middle-  
424 Income Countries: Systematic Review and Meta-analysis 2008-2013. *J Acquir Immune Defic Syndr*  
425 1999. 2015;69:98–108.
- 426 17. Kiwanuka G, Kiwanuka N, Muneza F, Nabirye J, Oporia F, Odikro MA, et al. Retention of HIV  
427 infected pregnant and breastfeeding women on option B+ in Gomba District, Uganda: a retrospective  
428 cohort study. *BMC Infect Dis* . 2018;18:533–533.
- 429 18. Chan AK, Kanike E, Bedell R, Mayuni I, Manyera R, Mlotha W, et al. Same day HIV diagnosis  
430 and antiretroviral therapy initiation affects retention in Option B+ prevention of mother-to-child  
431 transmission services at antenatal care in Zomba District, Malawi. *J Int AIDS Soc* . 2016;19:20672–  
432 20672.
- 433 19. Brinkhof MWG, Pujades-Rodriguez M, Egger M. Mortality of patients lost to follow-up in  
434 antiretroviral treatment programmes in resource-limited settings: systematic review and meta-  
435 analysis. *PloS One* . 2009;4:e5790–e5790.
- 436 20. World Health Organisation. Consolidated guidelines on the use of antiretroviral drugs for treating  
437 and preventing HIV infection Recommendations for a public health approach - Second edition .  
438 Geneva: WHO; 2013
- 439 21. WHO. Consolidated guidelines on the use of antiretroviral drugs for treating and preventing HIV  
440 infection Recommendations for a public health approach - Second edition . Second Edition. Geneva:  
441 WHO; 2016
- 442 22. Siedner MJ, Lankowski A, Haberer JE, Kembabazi A, Emenyonu N, Tsai AC, et al. Rethinking  
443 the “Pre” in Pre-Therapy Counseling: No Benefit of Additional Visits Prior to Therapy on Adherence  
444 or Viremia in Ugandans Initiating ARVs. *PLOS ONE* . 2012;7:e39894.

- 445 23. Scanlon ML, Vreeman RC. Current strategies for improving access and adherence to antiretroviral  
446 therapies in resource-limited settings. HIVAIDS Auckl NZ . 2013;5:1–17.
- 447 24. Mekuria LA, Prins JM, Yalew AW, Sprangers MAG, Nieuwkerk PT. Retention in HIV Care and  
448 Predictors of Attrition from Care among HIV-Infected Adults Receiving Combination Anti-  
449 Retroviral Therapy in Addis Ababa. PLOS ONE . 2015;10:e0130649.
- 450 25. Clouse K, Pettifor A, Shearer K, Maskew M, Bassett J, Larson B, et al. Loss to follow-up before  
451 and after delivery among women testing HIV positive during pregnancy in Johannesburg, South  
452 Africa. Trop Med Int Health TM IH . 2013;18:451–60.
- 453 26. Haas AD, Tenthani L, Msukwa MT, Tal K, Jahn A, Gadabu OJ, et al. Retention in care during  
454 the first 3 years of antiretroviral therapy for women in Malawi's option B+ programme: an  
455 observational cohort study. Lancet HIV . 2016;3:e175–82.
- 456 27. Chan AK, Kanike E, Bedell R, Mayuni I, Manyera R, Mlotha W, et al. Same day HIV diagnosis  
457 and antiretroviral therapy initiation affects retention in Option B+ prevention of mother-to-child  
458 transmission services at antenatal care in Zomba District, Malawi. J Int AIDS Soc . 2016;19:20672–  
459 20672.
- 460 28. Haas AD, van Oosterhout JJ, Tenthani L, Jahn A, Zwahlen M, Msukwa MT, et al. HIV  
461 transmission and retention in care among HIV-exposed children enrolled in Malawi's prevention of  
462 mother-to-child transmission programme. J Int AIDS Soc . 2017;20:21947–21947.
- 463 29. Jain V, Byonanebye DM, Amanyire G, Kwarisiima D, Black D, Kabami J, et al. Successful  
464 antiretroviral therapy delivery and retention in care among asymptomatic individuals with high CD4+  
465 T-cell counts above 350 cells/μl in rural Uganda. AIDS Lond Engl . 2014;28:2241–9.

466 30. Brown LB, Havlir DV, Ayieko J, Mwangwa F, Owaraganise A, Kwarisiima D, et al. High levels  
467 of retention in care with streamlined care and universal test and treat in East Africa. *AIDS Lond Engl*  
468 . 2016;30:2855–64.

469 31. Brown LB, Ayieko J, Mwangwa F, Owaraganise A, Kwarisiima D, Jain V, et al. Predictors of  
470 Retention in HIV Care Among Youth (15-24) in a Universal Test-and-Treat Setting in Rural Kenya.  
471 *J Acquir Immune Defic Syndr 1999* . 2017;76:e15–8.

472 32. Bekker L-G, Johnson L, Wallace M, Hosek S. Building our youth for the future. *J Int AIDS Soc*  
473 . 2015;18:20027–20027.

474 33. Chhim K, Mburu G, Tuot S, Sopha R, Khol V, Chhoun P, et al. Factors associated with viral non-  
475 suppression among adolescents living with HIV in Cambodia: a cross-sectional study. *AIDS Res*  
476 *Ther* . 2018;15:20–20.

477 34. Stephen D Lawn, Linda-Gail Bekker, Robert F Miller. Immune reconstitution disease associated  
478 with mycobacterial infections in HIV-infected individuals receiving antiretrovirals. *The Lancet*.  
479 2005;5:361–73.

480 35. Kitonsa J, Mayanja Y, Aling E, Kiwanuka J, Namutundu J, Anywaine Z, et al. Factors affecting  
481 mortality among HIV positive patients two years after completing recommended therapy for  
482 Cryptococcal meningitis in Uganda. *PloS One* . 2019;14:e0210287–e0210287.

483 36. Chia-Lei Lin, Nila Mistry, Jordana Boneh, Hong Li, Rina Lazebnik. Text Message Reminders  
484 Increase Appointment Adherence in a Pediatric Clinic: A Randomized Controlled Trial. *Int J Pediatr*.  
485 2016.

- 486 37. Bediang G, Stoll B, Elia N, Abena J-L, Geissbuhler A. SMS reminders to improve adherence and  
487 cure of tuberculosis patients in Cameroon (TB-SMS Cameroon): a randomised controlled trial. BMC  
488 Public Health . 2018;18:583–583.
- 489 38. Schwebel FJ, Larimer ME. Using text message reminders in health care services: A narrative  
490 literature review. Internet Interv . 2018;13:82–104.
- 491 39. van der Kop ML, Muhula S, Nagide PI, Thabane L, Gelmon L, Awiti PO, et al. Effect of an  
492 interactive text-messaging service on patient retention during the first year of HIV care in Kenya  
493 (WelTel Retain): an open-label, randomised parallel-group study. Lancet Public Health .  
494 2018;3:e143–52.
- 495 40. Berheto TM, Haile DB, Mohammed S. Predictors of Loss to follow-up in Patients Living with  
496 HIV/AIDS after Initiation of Antiretroviral Therapy. North Am J Med Sci . 2014;6:453–9.
- 497 41. Mberi MN, Kuonza LR, Dube NM, Nattey C, Manda S, Summers R. Determinants of loss to  
498 follow-up in patients on antiretroviral treatment, South Africa, 2004-2012: a cohort study. BMC  
499 Health Serv Res . 2015;15:259–259.
- 500 42. Hønge BL, Jespersen S, Nordentoft PB, Medina C, da Silva D, da Silva ZJ, et al. Loss to follow-up  
501 occurs at all stages in the diagnostic and follow-up period among HIV-infected patients in Guinea-  
502 Bissau: a 7-year retrospective cohort study. BMJ Open . 2013;3:e003499.
